# Supplementary material for: Blue Light Modulates Murine Microglial Gene Expression in the Absence of Optogenetic Protein Expression
Source: PubMed Central journal article supplement (PMC4756664; doi:10.1038/srep21172), 2016-02-17
Supplement: srep21172-s1.pdf [file srep21172-s1.pdf]

**Blue Light Modulates Murine Microglial Gene Expression in the Absence of Optogenetic Protein Expression**

**Supplementary Info**

Kevin P. Cheng<sup>1</sup>, Elizabeth A. Kiernan<sup>2</sup>, Kevin W. Eliceiri<sup>1</sup>, Justin C. Williams<sup>1</sup> and \*Jyoti J. Watters<sup>2</sup>

Departments of Biomedical Engineering<sup>1</sup> and Comparative Biosciences<sup>2</sup>, University of Wisconsin-Madison, Madison, WI 53706

Corresponding Author: Jyoti J. Watters, Department of Comparative Biosciences, 2015 Linden Drive, Madison, WI 53706. Tel: 608-262-1016, Fax: 608-263-3926, Email: [jjwatters@wisc.edu](mailto:jjwatters@wisc.edu)

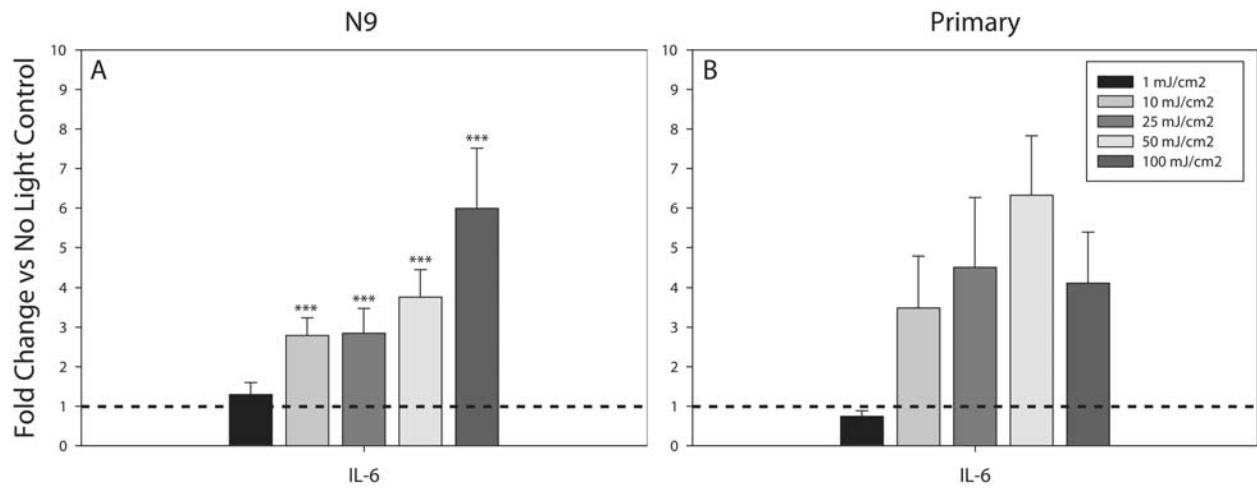

**Supplementary Figure 1: Effect of blue light on basal IL-6 gene expression.** Blue light (450 nm) was delivered for 1 second per minute for 6 hrs at the indicated energy doses. The data were analyzed using the  $\Delta\Delta C_t$  method ( $C_t$  values fell outside of the linear range of the standard curve), and are graphed as means  $\pm$  1 SEM of the light-induced % change in gene expression relative to that observed in the absence of light (dotted line). IL-6 gene expression in **a)** N9 microglia ( $n=6$  each light condition) and **b)** primary microglia ( $n=3$  light doses 1, 10, 25, 50 mJ/cm<sup>2</sup>;  $n=6$  light dose 0, 100 mJ/cm<sup>2</sup>). \*\* $P < 0.01$ , \*\*\* $P < 0.001$  vs. no light control by Holm-Sidak test.
